# Supplementary material
Source: PubMed Central journal article supplement (PMC5498182)
Supplement: supp_5.2.E468_2016-0156-1-at.pdf [file supp_5.2.E468_2016-0156-1-at.pdf]

**Appendix 1 (as supplied by the authors)**

**Table of contents**

Study timeframe definitions – Page 2

Incidence of supracondylar humerus fractures treated in Ontario at SickKids, other specialized paediatric centres, and community hospitals between 2002-2015 adapted from *Khoshbin et al.* – Page 3

**Supplementary Figure 1: Study timeframe definitions**

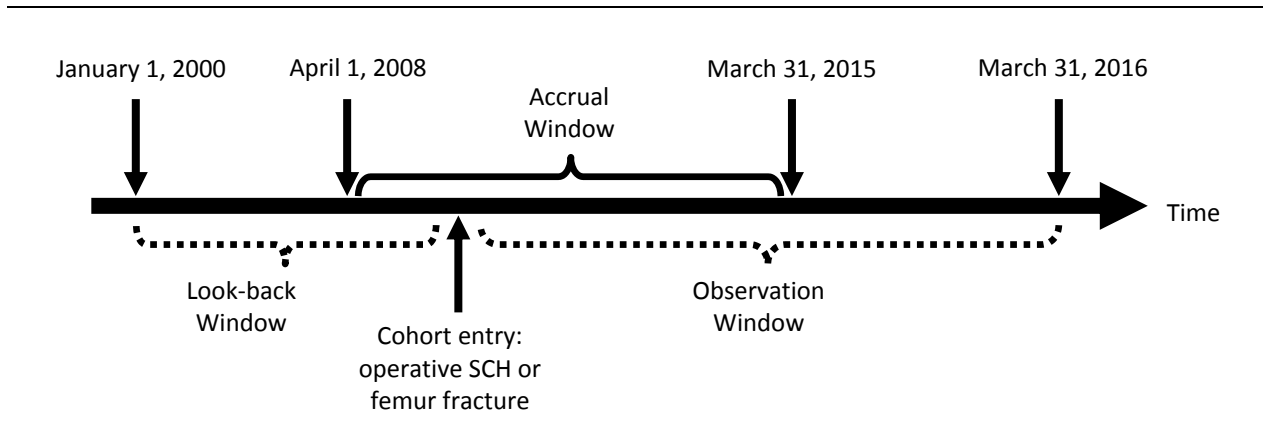

**Supplementary Table 1: Incidence of supracondylar humerus fractures treated in Ontario between 2002-2015 using population based data adapted from *Khoshbin et al.* Presented by their location of treatment.**

| Year                    | Location of treatment, N (%) |                                     |              |
|-------------------------|------------------------------|-------------------------------------|--------------|
|                         | SickKids                     | Other specialized paediatric centre | Community    |
| April 2002 – March 2003 | 43 (11.14%)                  | 138 (35.75%)                        | 205 (53.17%) |
| April 2003 – March 2004 | 58 (14.61%)                  | 143 (36.02%)                        | 196 (49.38%) |
| April 2004 – March 2005 | 80 (18.48%)                  | 148 (34.18%)                        | 205 (47.3%)  |
| April 2005 – March 2006 | 84 (19.81%)                  | 148 (34.9%)                         | 192 (45.31%) |
| April 2006 – March 2007 | 68 (15.32%)                  | 168 (37.85%)                        | 208 (46.9%)  |
| April 2007 – March 2008 | 60 (15.23%)                  | 146 (37.05%)                        | 188 (47.69%) |
| April 2008 – March 2009 | 67 (17.45%)                  | 144 (37.5%)                         | 173 (45.01%) |
| April 2009 – March 2010 | 70 (19.02%)                  | 152 (41.31%)                        | 146 (39.69%) |
| April 2010 – March 2011 | 66 (20.12%)                  | 132 (40.24%)                        | 130 (39.55%) |
| April 2011 – March 2012 | 137 (35.13%)                 | 115 (29.49%)                        | 138 (35.37%) |
| April 2012 – March 2013 | 116 (29.82%)                 | 128 (32.91%)                        | 145 (37.3%)  |
| April 2013 – March 2014 | 119 (29.97%)                 | 157 (39.55%)                        | 121 (30.46%) |
| April 2014 – March 2015 | 186 (37.73%)                 | 148 (30.02%)                        | 159 (32.29%) |
| April 2015 – March 2016 | 225 (39.54%)                 | 201 (35.33%)                        | 143 (25.14%) |
