# Supplementary material
Source: PubMed Central journal article supplement (PMC5498182)
Supplement: supp_5.2.E468_2016-0156-Original_submission.pdf [file supp_5.2.E468_2016-0156-Original_submission.pdf]

1  
2  
3  
4  
5  
6  
7  
8  
9  
10  
11  
12  
13  
14  
15  
16  
17  
18  
19  
20  
21  
22  
23  
24  
25  
26  
27  
28  
29  
30  
31  
32  
33  
34  
35  
36  
37  
38  
39  
40  
41  
42  
43  
44  
45  
46  
47  
48  
49  
50  
51  
52  
53  
54  
55  
56  
57  
58  
59  
60

## Informal Regionalization of Uncomplicated Pediatric Fracture Care in the Greater Toronto Area

### Authors

Daniel Pincus MD<sup>1,2,3</sup>

Steven Morrison BSc<sup>4</sup>

Martin F. Gargan, MA (Oxon), BM, BCh, FRCS<sup>1,4</sup>

Mark W. Camp MD, MSc, FRCS(C)<sup>1,4</sup>

### Affiliations

<sup>1</sup>Division of Orthopaedic Surgery, Department of Surgery, University of Toronto, Toronto, Canada

<sup>2</sup>Institute for Clinical Evaluative Sciences, Toronto, Canada

<sup>3</sup>Institute of Health Policy, Management and Evaluation, University of Toronto, Toronto, Canada

<sup>4</sup>The Hospital for Sick Children, Toronto, Canada

### Correspondence:

Daniel Pincus MD

Department of Surgery, Division of Orthopaedic Surgery, University of Toronto

149 College Street, Room 508-A

Toronto, ON M5T 1P5

Phone: 416-946-7957 (w), 647-244-3324 (c)

Fax: 416-978-3928

d.pincus@utoronto.ca

### Disclosures:

There are no relevant disclosures.

**Key Words:** Pediatrics; Orthopaedic Surgery; Epidemiology; Health Policy; Supracondylar Fractures; Femur; Fracture Fixation, Internal; Retrospective studies; Ontario; Canada

**ABSTRACT**

*Background.* Operative management of pediatric fractures is an expected competency in the specialty of Orthopedic Surgery by the Royal College of Physicians and Surgeons of Canada. However, specialized pediatric centres may be providing care for increasing numbers of uncomplicated fracture patients previously treated at community hospitals.

*Methods.* We examined trends of uncomplicated pediatric fractures presenting to a specialized pediatric centre (SickKids) from anywhere in the Greater Toronto Area (GTA) between April 1, 2008 and March 31, 2015. Consecutive patients admitted to SickKids and requiring operative intervention for a supracondylar humerus (SCH) or femur fracture were considered. Changes in operative incidence rates per year were calculated by multivariable negative binomial regression models.

*Results.* Baseline characteristics of 945 SCH and 421 femur fractures were similar irrespective of which year fixation occurred. The annual incidence rate of uncomplicated SCH fracture cases increased from 108 to 169 (53%) at an adjusted rate of 7.5% per year (adjusted IRR=1.075, 95% CI=1.072-1.079,  $p<0.001$ ). Similarly, femur fracture cases increased from 49 to 69 (45%) at an adjusted rate of 5.3% per year (adjusted IRR=1.053, 95% CI=1.044-1.062,  $p<0.001$ ). Significant increases were observed independent of fracture classification, stabilization method, whether patients were transferred from an outside hospital or presented directly, patient geographic location, or the season in which the fracture occurred.

*Conclusion.* Adjusted annual incidence rates significantly increased during the study period. Further work is needed to assess the clinical impact of informal, regionalized care, and determine if the phenomenon occurs in other specialties.

## **INTRODUCTION**

Supracondylar humerus (SCH) and femur fractures are the two most common operatively treated pediatric fractures in Ontario.(1) Operative management of simple and complex pediatric fractures is an expected competency within the Objectives of Training in the specialty of Orthopedic Surgery for the Royal College of Physicians and Surgeons of Canada (RCPSC).(2) However, anecdotes in our region indicate specialized pediatric centres are providing care for increasing numbers of uncomplicated fracture patients previously treated in community hospitals. This 'informal regionalization' of uncomplicated pediatric trauma care may not yield benefits ascribed to 'formal regionalization', which include cost savings and improved quality.(3-6)

Therefore, the primary objective of this study was to examine trends for uncomplicated pediatric fractures presenting to a specialized pediatric centre from anywhere in the Greater Toronto Area (GTA, population 6.054 million in 2011). Secondary objectives included assessing direct costs attributable to treating uncomplicated trauma cases at a dedicated pediatric centre and to determine the location of residence of these patients. We hypothesized patients were increasingly arriving from several geographic areas within GTA, both by direct presentation and outside hospital transfer, after adjustment for population changes and several covariates that may have influenced these rates.

## **METHODS**

### **Setting**

1  
2  
3 We conducted a retrospective, serial, cross-sectional study at the Hospital for Sick  
4 Children (SickKids) in Toronto, Ontario. Consecutive patients admitted to the hospital and  
5 requiring operative intervention for a SCH or femur fracture between April 1, 2008 and March  
6 31, 2015 were identified using the hospital's *Surgical Information System* database (SIS 4.7.10a,  
7 Surgical Information Systems LLC).(7) The beginning of the study period was chosen on the  
8 basis of when recording detailed data regarding every surgical case became routine  
9 (Supplementary Appendix). Detailed chart abstraction followed and was performed by medical  
10 and orthopaedic trainees (authors DP and SM, acknowledgements AU and HM) and reviewed  
11 by two pediatric orthopaedic surgeons (authors MG and MC). The investigation received  
12 approval from the SickKids Research Ethics Board.  
13  
14  
15  
16  
17  
18  
19  
20  
21  
22  
23  
24  
25  
26  
27  
28  
29  
30

### 31 Population

32  
33 Patients aged 0-14 requiring operative intervention for a SCH or femur fracture during  
34 the study period were eligible for inclusion. "Complicated" fractures were defined as those  
35 necessitating pediatric orthopaedic specialist referral and operationalized as being: (a)  
36 associated with bone cysts, pathological lesions, or non-accidental injury or (b) referred for  
37 revision surgery or treatment failure after initial non-operative management. Lookback for  
38 "complicated" cases occurred to January 1, 2000. Geographic boundaries of the GTA were  
39 defined by the borders of Local Health Integrated Networks (LHINs) 5, 6, 7, 8 and 9; patients  
40 residing outside these regions were excluded.  
41  
42  
43  
44  
45  
46  
47  
48  
49  
50  
51  
52  
53  
54  
55

### 56 Outcomes

1  
2  
3 The primary outcome comprised annual incidence rates of SCH and femur fractures. The  
4  
5 number of operations performed each fiscal year are population-adjusted to account for  
6  
7 population changes during the study period. Specifically, all rates are standardized to the 2011  
8  
9 age 0-14 GTA population (2011 Canadian census).  
10

11  
12  
13 Healthcare costs, inpatient length of stay, and patient location of residence were also  
14  
15 considered. Direct healthcare costs (CDN\$2014) incurred by each patient during their index  
16  
17 admission and paid by the hospital were calculated by the hospital's case costing methodology,  
18  
19 which attributes resource intensity weights (RIWs) to care episodes. Each patient was also  
20  
21 mapped to their location of residence or "dissemination area (DA)" using ArcGIS 10.2 (ESRI)  
22  
23 software. DAs are the smallest geographic unit for which census population data are available  
24  
25 in Canada. The bar chart option was used to create bar maps, where the height of the bar  
26  
27 represents the total sum of fractures by year in each LHIN.  
28  
29  
30  
31  
32  
33  
34  
35

### 36 Main exposure and covariates

37  
38 The fiscal year (April 1 to March 31) in which surgery occurred constituted the primary  
39  
40 exposure. Several covariates potentially motivating pediatric orthopaedic specialist referral  
41  
42 were also measured. Need for dedicated pediatric anesthesia was assessed using the American  
43  
44 Society of Anesthesiologists (ASA) score and the presence of patient comorbidity (yes/no) listed  
45  
46 on hospital admission records. Several injury specific variables included: (a) the Gartland  
47  
48 classification for SCH fractures (II versus III or IV),(8) (b) femur stabilization method (fixation  
49  
50 versus spica casting), (c) injury energy including open fractures, (d) associated fracture,  
51  
52 neurovascular injury or compartment syndrome, and (e) the requirement for reoperation (up to  
53  
54  
55  
56  
57  
58  
59  
60

1  
2  
3 March 31, 2016). Admission characteristics comprised: (a) being transferred directly from an  
4  
5 outside hospital (b) surgery occurring during summer months (April – September) or “after-  
6  
7 hours” (between 1700-0700 hours during the week or anytime over the weekend), (c) time  
8  
9 elapsed from SickKids emergency department (ED) presentation to surgery, and (d) duration of  
10  
11 surgery (total time elapsed in the operating room).  
12  
13  
14  
15  
16  
17

### 18 Statistical Analysis

20  
21 Descriptive statistics were calculated for all variables. Age was normally distributed and  
22  
23 expressed with other continuous variables using means and standard deviations. Categorical  
24  
25 variables were calculated as proportions. Whether baseline characteristics changed over time  
26  
27 was assessed using the Cochran–Armitage Trend test for categorical variables and simple linear  
28  
29 regression for continuous variables. Changes in SCH and femur operative incidence rates were  
30  
31 calculated using incidence rate ratios (IRRs) for 1-year increments spanning each fiscal year. To  
32  
33 address potential temporal confounding by demographic, injury and admission characteristics  
34  
35 that may have differentially motivated pediatric orthopaedic specialist referral by year,  
36  
37 adjusted IRRs were calculated using two multivariable negative binomial regression models.  
38  
39 Predictors included in the multivariable model for SCH operative rates were age, sex, ASA, LHIN,  
40  
41 Gartland classification, open fracture, pre-operative nerve palsy, associated fracture, summer,  
42  
43 and after-hours surgery. Predictors included in the multivariable model for femur operative  
44  
45 rates were age, sex, presence of comorbidity, LHIN, injury severity (high/low energy),  
46  
47 stabilization method (spica/fixation), open fracture, associated fracture, summer, and after-  
48  
49 hours surgery. IRRs and 95% confidence intervals (CIs) are reported.  
50  
51  
52  
53  
54  
55  
56  
57  
58  
59  
60

## Sensitivity Analyses

We examined for the presence of effect modification in subgroup analyses stratified according to: (a) patient transfer status (outside transfer/direct presentation), (b) Gartland SCH fracture classification, (c) femur stabilization method (fixation versus spica casting), (d) patient location (LHIN) of residence, and (e) season of surgery (summer versus winter). All statistical analyses were performed using SAS® Studio 9.3 University Edition (SAS® Institute, NC) and the type I error probability was 0.05 for all two-sided tests of statistical significance.

## RESULTS

### Baseline characteristics

Amongst 1366 uncomplicated fractures that underwent operative intervention between 2008 and 2014 and met inclusion criteria for the study, 945 were SCH fractures and 421 were femur fractures, respectively (Figure 1). The mean age of SCH patients during the study period was 5.44 years and 52.6% were male. With regards to femur fracture patients, their mean age was 5.53 years and the majority were male (74.4%).

Comparing baseline characteristics by year of surgery (Tables 1a and 1b), mean SCH surgery duration was shorter ( $69.98 \pm 32.87$  versus  $81.40 \pm 21.51$ ,  $p$  for trend = 0.005) and a smaller proportion of femur procedures were performed after-hours (39.1% versus 66%,  $p$  for trend = 0.003) in 2014 compared to 2008. The proportion of both SCH and femur patients with any comorbidity listed on their admission record increased ( $p$  for trend =  $<0.001$ ). However,

1  
2  
3 ASA classification did not change over time. Other baseline characteristics were similar in both  
4  
5  
6 SCH and femur fracture groups, independent of which year fixation occurred.  
7  
8  
9

### 10 11 Outcomes

12  
13 The annual incidence rate of uncomplicated SCH fracture cases increased from 108 to  
14  
15 169 (53%) during the study period at an adjusted rate of 7.5% per year (adjusted IRR = 1.075,  
16  
17 95% CI = 1.072-1.079,  $p < 0.001$ ). Similarly, the annual incidence rate of uncomplicated femur  
18  
19 fracture cases increased from 49 to 69 (45%) during the study period at an adjusted rate of  
20  
21 5.3% per year (adjusted IRR = 1.053, 95% CI = 1.044-1.062,  $p < 0.001$ , Figure 3).  
22  
23  
24  
25  
26  
27

### 28 29 Sensitivity Analyses

30  
31 Significant increases in adjusted fracture rates were observed independent of the SCH  
32  
33 fracture classification or femur stabilization method (Table 2 and Figures 4a and 4b). Adjusted  
34  
35 SCH fracture rates increased independent of whether patients were transferred or presented  
36  
37 directly. In contrast, increases in adjusted femur fracture rates were only significant for  
38  
39 transferred patients, not those who presented directly (adjusted IRR = 1.060, 0.99-1.13,  $p =$   
40  
41  $< 0.089$ ).  
42  
43  
44  
45  
46  
47

### 48 49 Secondary outcomes

#### 50 51 52 53 54 A) Patient location of residence 55 56 57 58 59 60



1  
2  
3  
4 The location of residence for each patient during the study period (by dissemination  
5 area) can be visualized in Figure 2. Furthermore, the incidence of uncomplicated fractures  
6 increased each successive year, from the majority of LHINs in the GTA (Figure 4a).  
7  
8  
9

#### 10 11 12 13 B) Costs

14  
15  
16 Considering direct healthcare costs incurred by fracture patients presenting during the  
17 year 2014 only, SickKids paid \$821,248 for these index admissions. Of this total, \$715,026 (or  
18 87.1%) was spent that year to treat 193 patients living outside the Toronto Central LHIN.  
19  
20 Alternatively, the hospital paid \$705,451 (or 85.9%) to treat 187 patients who were transferred  
21 directly from outside hospitals.  
22  
23  
24  
25  
26  
27  
28  
29  
30

#### 31 Interpretation

##### 32 33 34 35 36 *Principal findings*

37  
38 We examined trends for the two most commonly treated operatively treated pediatric  
39 fractures in Ontario presenting to our hospital from anywhere in the GTA between 2008 and  
40 2014. Patient baseline characteristics were similar irrespective of which year fixation occurred.  
41  
42 The annual incidence rate of uncomplicated SCH fracture cases increased from 108 to 169  
43 (53%) at an adjusted rate of 7.5% per year (adjusted IRR = 1.075, 95% CI = 1.072-1.079,  
44  
45 p<0.001). Similarly, femur fracture cases increased from 49 to 69 (45%) during the study period  
46  
47 at an adjusted rate of 5.3% per year (adjusted IRR = 1.053, 95% CI = 1.044-1.062, p<0.001).  
48  
49 Significant increases in adjusted fracture rates were observed independent of fracture  
50  
51  
52  
53  
54  
55  
56  
57  
58  
59  
60

1  
2  
3 classification, fracture stabilization method, whether patients were transferred from an outside  
4  
5 hospital or presented directly, patient geographic location, or the season in which the fracture  
6  
7 occurred.  
8  
9

### 10 11 12 13 *Implications*

14  
15  
16 We found significantly increased annual incidence rates of uncomplicated fractures  
17  
18 managed at a specialized pediatric centre, even after adjustment for population changes and  
19  
20 several covariates that may have influenced these rates. At present, operative management of  
21  
22 pediatric fractures is an expected competency in the specialty of Orthopedic Surgery by the  
23  
24 RCPSC.(2) In order to attain that competency, a surgical trainee must be given opportunities to  
25  
26 perform pediatric fracture operations. The potential risk to the patient at hand may be  
27  
28 mitigated by appropriate supervision and justified by the benefit to future patients having  
29  
30 access to a competent surgical workforce(9-11). However, our findings call into question  
31  
32 whether the active involvement of orthopaedic trainees in the technical aspects of these cases  
33  
34 is ethically justifiable if they will not be treating these injuries as general orthopaedic  
35  
36 surgeons.(2)  
37  
38  
39  
40  
41  
42

43  
44 We also observed the vast majority of uncomplicated pediatric fracture cases treated at  
45  
46 SickKids during the study period were transferred from outside hospitals (>70% every year for  
47  
48 both fracture types). Although we cannot know whether the indication to transfer patients for  
49  
50 definitive treatment was due to the technical difficulty of these cases, our experience is that the  
51  
52 indication for referrals in the vast majority of cases is primarily logistical and that some  
53  
54 surgeons and/or hospitals may be categorically refusing to treat patients with these injuries.  
55  
56  
57  
58  
59  
60

1  
2  
3  
4  
5  
6  
7  
8  
9  
10  
11  
12  
13  
14  
15  
16  
17  
18  
19  
20  
21  
22  
23  
24  
25  
26  
27  
28  
29  
30  
31  
32  
33  
34  
35  
36  
37  
38  
39  
40  
41  
42  
43  
44  
45  
46  
47  
48  
49  
50  
51  
52  
53  
54  
55  
56  
57  
58  
59  
60

Prior surveys found that only 29% of ED physicians said their orthopaedist always came in when asked to evaluate a patient; the top two barriers being complexity of the injury and day/night or weekend timing.(12) However, we found significant increases in adjusted fracture rates occurred independent of the complexity of injury and whether surgery was performed after hours or during the summer. Median surgeon SCH fixation volume is only 9 cases per year in Ontario.(13) Thus, over time, referrals may be self-fulfilling; transfers begetting transfers as case volumes and associated technical competence decreases, particularly in the context of increasing specialization.(3, 14-21)

Although informal regionalization appears to be occurring in the GTA for uncomplicated paediatric trauma, its effect on clinical outcomes is unclear. Controversy exists about whether lower complication rates are related to treatment at academic facilities for pediatric fractures,(13, 22-24) particularly when transfer delays are expected.(25) Irrespective of its effect on clinical outcomes, our study illustrates that informal regionalization is already occurring in the GTA for pediatric fractures. Assuming Ontario's operative SCH rates have remained similar to those during the 2000s (Supplementary Appendix), SickKids went from treating approximately one third of all SCH cases in the Province to one half during the study period. However, centralization of care has occurred without formal horizontal integration between hospitals or surgeons.(4) While formal regionalization arrangements recognize that cost savings and improved quality may arise from consolidation efforts,(6) informal regionalization is occurring without these benefits. For example, although 193 uncomplicated fracture patients living outside the Toronto Central LHIN were treated at our hospital in 2014, costs (\$715,026) required for care did not follow. The "quality-based procedure" paradigm in

1  
2  
3 Ontario is an example of how policy and funding regarding pediatric orthopaedic trauma care  
4  
5 may be formalized.  
6  
7

8 At the same time, specialized pediatric centres are being increasingly challenged with  
9  
10 providing timely care for increasing numbers of uncomplicated patients previously treated in  
11  
12 the community. In the absence of a dedicated orthopaedic trauma program to manage these  
13  
14 injuries, approximately half of the operative cases in this study occurred after-hours, and wait  
15  
16 times for these procedures did not improve over the course of the study period. Thus, our  
17  
18 findings may help inform policy, funding, and formal integration regarding pediatric  
19  
20 orthopaedic trauma care in our region and beyond.  
21  
22  
23  
24  
25  
26  
27

### 28 *Limitations*

29  
30  
31 The most important limitation of this study is that we could not identify fracture rates  
32  
33 presenting to other institutions in the GTA. Although it is possible that rates are also increasing  
34  
35 at other hospitals in our region, this is unlikely for several reasons. First, rates of SCH fixation  
36  
37 procedures in Ontario remained stable, or decreased, during the 2000s.(13) Second, the age 0-  
38  
39 14 GTA population was expected to increase by a significantly lower rate (0.45%) than the  
40  
41 fracture rates observed during the study period (2011 Canadian census). Indeed, all reported  
42  
43 rates in this article were population standardized to remove the influence of population  
44  
45 changes. Lastly, adjusted rates accounted for several potential temporal confounders and  
46  
47 sensitivity analyses removed potential effect modification. For example, practice patterns  
48  
49 would not have been expected to change for both Gartland II and Gartland III SCH fractures  
50  
51 during the study period. A significant strength of our study design was the detailed chart review  
52  
53  
54  
55  
56  
57  
58  
59  
60

1  
2  
3 which enabled us to precisely define “complicated” cases, exclude them, and stratify our  
4  
5 analysis by the severity of injury.  
6  
7

8  
9 Second, although the beginning of the study period was chosen on the basis of when  
10 recording consecutive surgical cases became reliable, we recognize that changes may have  
11 occurred well before 2008. We also cannot explain the large incidence increase in 2011. Since  
12 our objective *a priori* was to describe adjusted fracture rates presenting to our institution,  
13 rather than explore a specific occurrence in 2011 or the influence of a specific intervention, we  
14 did not conduct a formal time-series analysis. Lastly, we only evaluated two operative fracture  
15 types. Thus, our analysis likely significantly underestimated the cost of treating uncomplicated  
16 cases from outside institutions.  
17  
18  
19  
20  
21  
22  
23  
24  
25  
26  
27  
28  
29  
30

### 31 *Final Conclusions and future directions*

32  
33 Throughout the study period, patients increasingly arrived from several geographic  
34 regions within the GTA, both by direct presentation and outside hospital transfer. We advocate  
35 that policy and funding regarding pediatric orthopaedic trauma care in our region be  
36 formalized. Our findings may also inform future training requirements for general orthopaedic  
37 surgeons. Further work is needed to assess the clinical impact of informal, regionalized care, to  
38 determine if the phenomenon is found in other specialties, and to understand why it is  
39 occurring.  
40  
41  
42  
43  
44  
45  
46  
47  
48  
49  
50

### 51 **SOURCE OF FUNDING**

52  
53  
54  
55  
56  
57  
58  
59  
60

1  
2  
3 This study was supported by internal funding from the Hospital for Sick Children Department of  
4  
5 Orthopaedic Surgery. No benefits have been received or will be received from a commercial  
6  
7 party related directly or indirectly to the subject of this article.  
8  
9

### 10 11 12 13 **ACKNOWLEDGEMENTS**

14  
15  
16 We sincerely thank Alex Uren and Hannah Matthews for their help with data collection and  
17  
18 Peter Godzyra for creating the maps presented in this article.  
19  
20  
21  
22  
23  
24  
25  
26  
27  
28  
29  
30  
31  
32  
33  
34  
35  
36  
37  
38  
39  
40  
41  
42  
43  
44  
45  
46  
47  
48  
49  
50  
51  
52  
53  
54  
55  
56  
57  
58  
59  
60

Confidential

## References

1. Escott B. Childhood Fracture Begets Childhood Fracture: A Population-based Study of Longitudinal Fracture Patterns in Ontario Children. Toronto, Canada: University of Toronto; 2012.
2. RCPSC. Objectives of Training in the specialty of Orthopedic Surgery. 2010.
3. Urbach DR. Pledging to Eliminate Low-Volume Surgery. *N Engl J Med*. 2015;373(15):1388.
4. Lewis S, Kouri D. Regionalization: making sense of the Canadian experience. *Healthcare Papers*. 2004;5(1):12.
5. Block EF, Rudloff B, Noon C, Behn B. Regionalization of surgical services in central Florida: the next step in acute care surgery. *The Journal of trauma*. 2010;69(3):640.
6. Collier R. Is regionalization working? *CMAJ : Canadian Medical Association journal = journal de l'Association medicale canadienne*. 2010;182(4):331.
7. Heng M, Wright JG. Dedicated operating room for emergency surgery improves access and efficiency. *Canadian Journal of Surgery*. 2013;56(3):167.
8. Barton KL, Kaminsky CK, Green DW, Shean CJ, Kautz SM, Skaggs DL. Reliability of a modified Gartland classification of supracondylar humerus fractures. *Journal of pediatric orthopedics*. 2001;21(1):27.
9. Dall TM, Gallo PD, Chakrabarti R, West T, Semilla AP, Storm MV. The care span: An aging population and growing disease burden will require a large and specialized health care workforce by 2025. *Health affairs*. 2013;32(11):2013.
10. Beasley GM, Pappas TN, Kirk AD. Procedure delegation by attending surgeons performing concurrent operations in academic medical centers: Balancing safety and efficiency. *Annals of Surgery*. 2015;261(6):1044.
11. Ali MR, Tichansky DS, Kothari SN, McBride CL, Fernandez Jr AZ, Sugerman HJ, et al. Validation that a 1-year fellowship in minimally invasive and bariatric surgery can eliminate the learning curve for laparoscopic gastric bypass. *Surgical Endoscopy and Other Interventional Techniques*. 2010;24(1):138.
12. Cantu RV, Bell JE, Padula WV, Nahikian KR, Pober DM. How do emergency department physicians rate their orthopaedic on-call coverage? *Journal of orthopaedic trauma*. 2012;26(1):54.
13. Khoshbin A, Leroux T, Wasserstein D, Wolfstadt J, Law PW, Mahomed N, et al. The epidemiology of paediatric supracondylar fracture fixation: a population-based study. *Injury*. 2014;45(4):701.
14. Cowan JA, Jr., Dimick JB, Henke PK, Huber TS, Stanley JC, Upchurch GR, Jr. Surgical treatment of intact thoracoabdominal aortic aneurysms in the United States: hospital and surgeon volume-related outcomes. *Journal of vascular surgery*. 2003;37(6):1169.
15. Hu JC, Gold KF, Pashos CL, Mehta SS, Litwin MS. Role of surgeon volume in radical prostatectomy outcomes. *Journal of clinical oncology : official journal of the American Society of Clinical Oncology*. 2003;21(3):401.
16. Lieberman MD, Kilburn H, Lindsey M, Brennan MF. Relation of perioperative deaths to hospital volume among patients undergoing pancreatic resection for malignancy. *Annals of Surgery*. 1995;222(5):638.

17. Simunovic M, To T, Theriault M, Langer B. Relation between hospital surgical volume and outcome for pancreatic resection for neoplasm in a publicly funded health care system. *CMAJ : Canadian Medical Association journal = journal de l'Association medicale canadienne*. 1999;160(5):643.
18. Ravi B, Jenkinson R, Austin PC, Croxford R, Wasserstein D, Escott B, et al. Relation between surgeon volume and risk of complications after total hip arthroplasty: propensity score matched cohort study. *BMJ (Clinical research ed)*. 2014;348:g3284.
19. Stavrakis AI, Ituarte PH, Ko CY, Yeh MW. Surgeon volume as a predictor of outcomes in inpatient and outpatient endocrine surgery. *Surgery*. 2007;142(6):887.
20. Poeze M, Verbruggen JPAM, Brink PRG. The Relationship Between the Outcome of Operatively Treated Calcaneal Fractures and Institutional Fracture Load. *The Journal of Bone & Joint Surgery*. 2008;90(5):1013.
21. Sahni NR, Dalton M, Cutler DM, Birkmeyer JD, Chandra A. Surgeon specialization and operative mortality in United States: retrospective analysis. *BMJ*. 2016;354:i3571.
22. Ibrahim T, Hegazy A, Abulhail SI, Ghomrawi HM. Utility of the AAOS Appropriate Use Criteria (AUC) for Pediatric Supracondylar Humerus Fractures in Clinical Practice. *J Pediatr Orthop*. 2015.
23. Mulpuri K, Hosalkar H, Howard A. AAOS clinical practice guideline: The treatment of pediatric supracondylar humerus fractures. *Journal of the American Academy of Orthopaedic Surgeons*. 2012;20(5):328.
24. Kasser JR. Location of treatment of supracondylar fractures of the humerus in children. *Clinical Orthopaedics & Related Research*. 2005.
25. Loizou CL, Simillis C, Hutchinson JR. A systematic review of early versus delayed treatment for type III supracondylar humeral fractures in children. *Injury*. 2009;40(3):245-8.



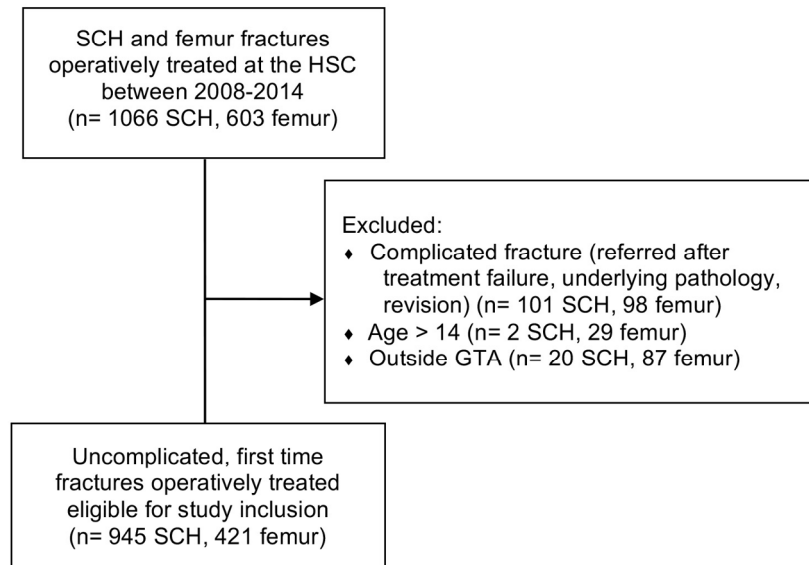

28  
29  
30  
31  
32  
33  
34  
35  
36  
37  
38  
39  
40  
41  
42  
43  
44  
45  
46  
47  
48  
49  
50  
51  
52  
53  
54  
55  
56  
57  
58  
59  
60

Figure 1. Uncomplicated paediatric fracture patients operatively treated at the Hospital for Sick Children between 2008 and 2014 included and excluded in the study cohort.

Amongst 1366 uncomplicated fra  
153x96mm (300 x 300 DPI)

ential

1  
2  
3  
4  
5  
6  
7  
8  
9  
10  
11  
12  
13  
14  
15  
16  
17  
18  
19  
20  
21  
22  
23  
24  
25  
26  
27  
28  
29  
30  
31  
32  
33  
34  
35  
36  
37  
38  
39  
40  
41  
42  
43  
44  
45  
46  
47  
48  
49  
50  
51  
52  
53  
54  
55  
56  
57  
58  
59  
60

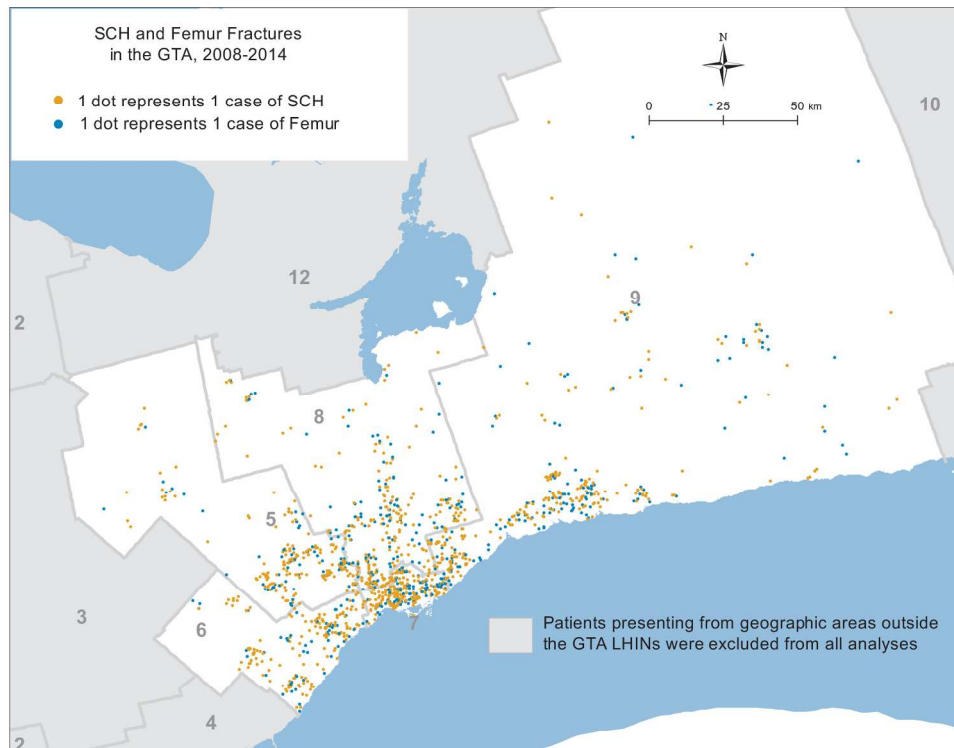

Figure 2. Location (dissemination areas) of patients with uncomplicated fractures treated operatively at the Hospital for Sick Children (2008-2014).  
The location of residence for  
196x152mm (300 x 300 DPI)

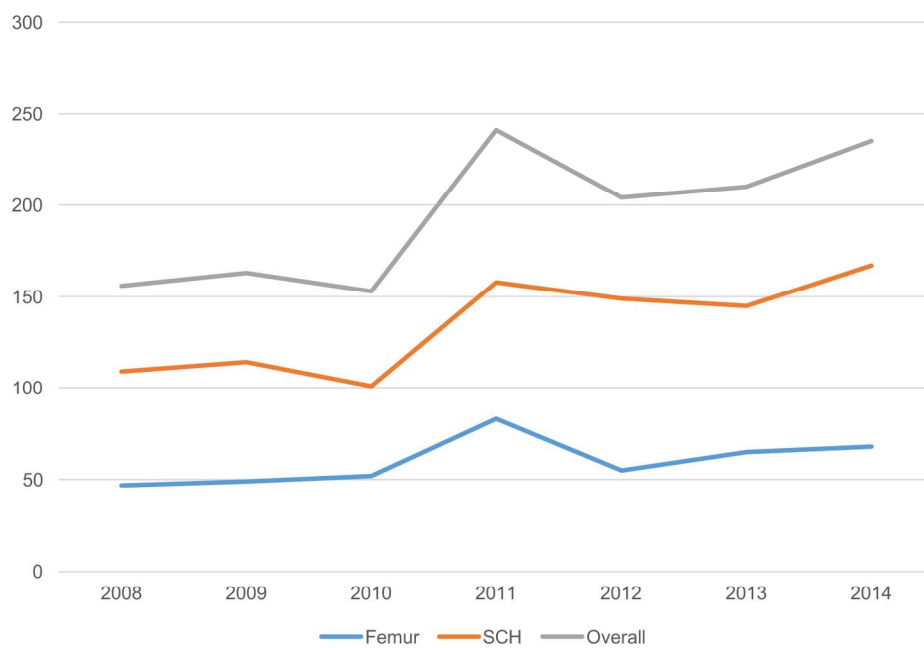

Figure 3. Population standardized\* annual incidence rates of uncomplicated fractures treated operatively at the Hospital for Sick Children (2008-2014). \*GTA population aged 0-14 year 2011. Similarly, the annual incidence 171x117mm (300 x 300 DPI)

1  
2  
3  
4  
5  
6  
7  
8  
9  
10  
11  
12  
13  
14  
15  
16  
17  
18  
19  
20  
21  
22  
23  
24  
25  
26  
27  
28  
29  
30  
31  
32  
33  
34  
35  
36  
37  
38  
39  
40  
41  
42  
43  
44  
45  
46  
47  
48  
49  
50  
51  
52  
53  
54  
55  
56  
57  
58  
59  
60

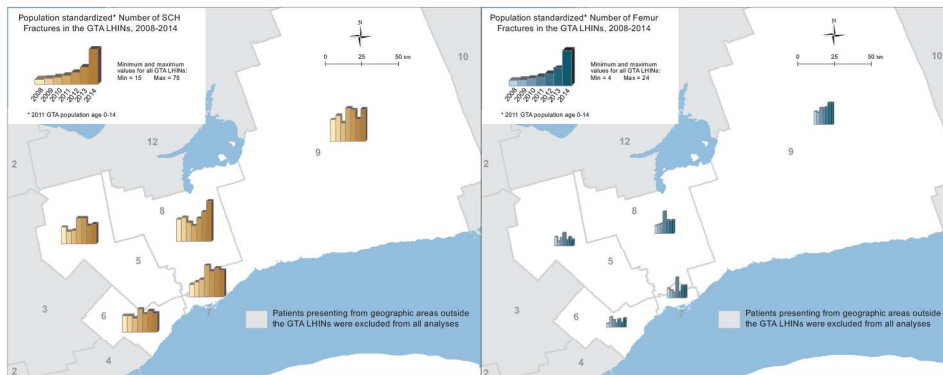

Figure 4a. Subgroup analyses. Population standardized annual incidence rates of uncomplicated fractures treated operatively at the Hospital for Sick Children (2008-2014), by patient LHIN. Significant increases in adjus  
201x91mm (300 x 300 DPI)

1  
2  
3  
4  
5  
6  
7  
8  
9  
10  
11  
12  
13  
14  
15  
16  
17  
18  
19  
20  
21  
22  
23  
24  
25  
26  
27  
28  
29  
30  
31  
32  
33  
34  
35  
36  
37  
38  
39  
40  
41  
42  
43  
44  
45  
46  
47  
48  
49  
50  
51  
52  
53  
54  
55  
56  
57  
58  
59  
60

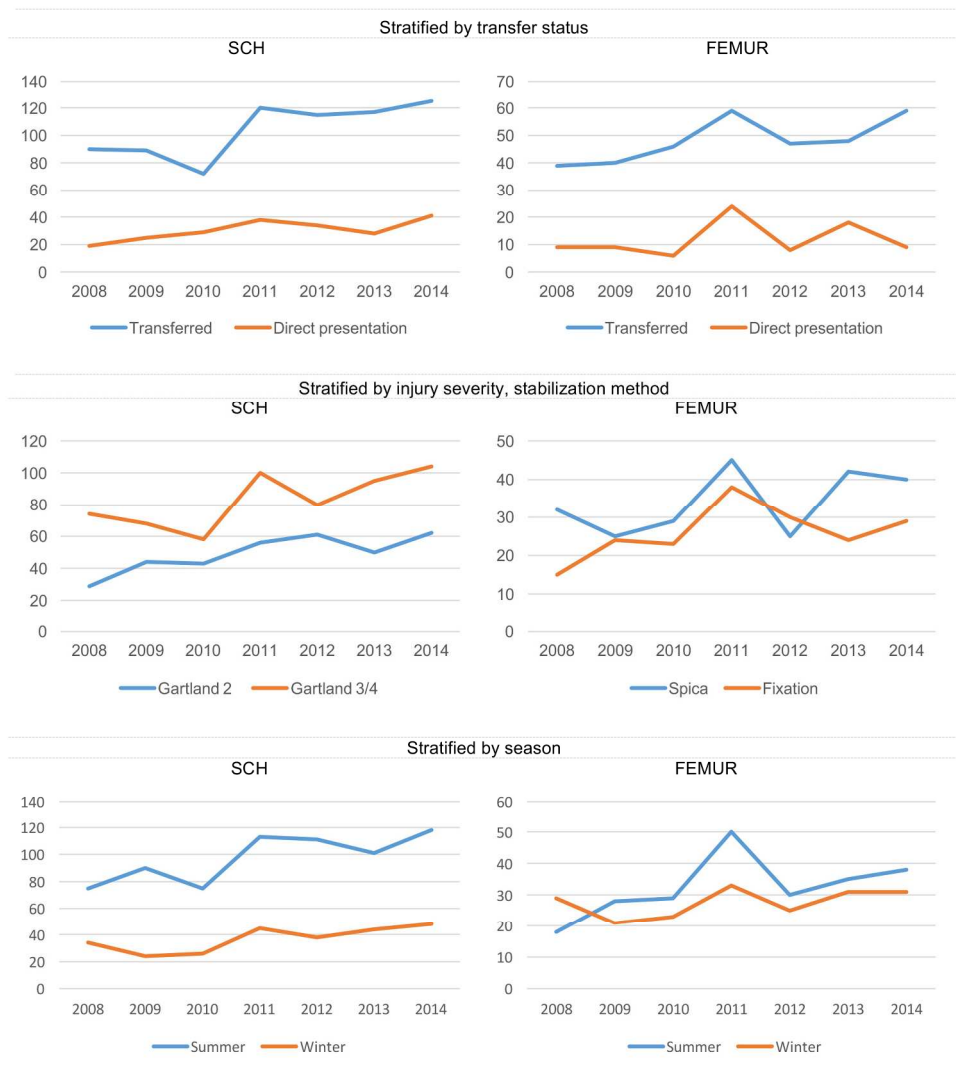

Figure 4b. Subgroup analyses. Population standardized\* annual incidence rates of uncomplicated fractures treated operatively at the Hospital for Sick Children (2008-2014), by patient subgroup. \* \*GTA population aged 0-14 year 2011.

Significant increases in adjus  
200x228mm (300 x 300 DPI)

Table 1a (SCH)

|                                              | 2008 (n=108)         | 2009 (n=113)         | 2010 (n=101)         | 2011 (n=158)         | 2012 (n=150)         | 2013 (n=146)         | 2014 (n=169)         | Missing, n (%) | p (for trend) |
|----------------------------------------------|----------------------|----------------------|----------------------|----------------------|----------------------|----------------------|----------------------|----------------|---------------|
| <b>Demographics</b>                          |                      |                      |                      |                      |                      |                      |                      |                |               |
| Age, mean ( $\pm$ SD)                        | 5.44 ( $\pm$ 2.47)   | 5.20 ( $\pm$ 2.54)   | 5.66 ( $\pm$ 2.78)   | 5.35 ( $\pm$ 2.42)   | 5.53 ( $\pm$ 2.55)   | 5.51 ( $\pm$ 2.50)   | 5.43 ( $\pm$ 2.47)   | 0 (0)          | 0.695         |
| Female, n (%)                                | 56 (51.9)            | 64 (56.6)            | 39 (39.4)            | 68 (43.6)            | 63 (42.0)            | 70 (48.0)            | 86 (50.9)            | 4 (0.4)        | 0.593         |
| ASA                                          |                      |                      |                      |                      |                      |                      |                      | 30 (3.2)       | 0.345         |
| 1, n (%)                                     | 86 (86.9)            | 96 (90.6)            | 85 (87.6)            | 136 (88.3)           | 129 (87.8)           | 128 (87.7)           | 154 (92.8)           |                |               |
| 2, n (%)                                     | 11 (11.1)            | 9 (8.5)              | 11 (11.3)            | 16 (10.4)            | 17 (11.6)            | 16 (11.0)            | 10 (6.0)             |                |               |
| 3, n (%)                                     | 2 (2.02)             | 1 (0.94)             | 1 (1.03)             | 2 (1.3)              | 1 (0.7)              | 2 (1.4)              | 2 (1.2)              |                |               |
| Presence of any comorbidity, n (%)           | 0 (0)                | 0 (0)                | 2 (2.0)              | 3 (1.9)              | 0                    | 7 (4.8)              | 5 (3.0)              | 0 (0)          | 0.007         |
| <b>Injury characteristics</b>                |                      |                      |                      |                      |                      |                      |                      |                |               |
| Gartland (III or IV), n (%)                  | 73 (71.6)            | 67 (60.4)            | 58 (57.4)            | 100 (64.1)           | 89 (59.3)            | 96 (65.8)            | 105 (62.5)           | 11 (1.2)       | 0.615         |
| Open fracture, n (%)                         | 3 (2.8)              | 1 (0.9)              | 1 (1.0)              | 4 (2.6)              | 2 (1.4)              | 0 (0)                | 2 (1.2)              | 13 (1.4)       | 0.259         |
| Associated injury, n (%)                     | 3 (2.8)              | 5 (4.4)              | 8 (7.9)              | 4 (2.5)              | 6 (4.0)              | 3 (2.1)              | 4 (2.4)              | 0 (0)          | 0.229         |
| Pre-operative nerve palsy, n (%)             | 24 (22.2)            | 21 (19.4)            | 17 (17.4)            | 22 (14.5)            | 19 (12.8)            | 18 (12.4)            | 34 (21.0)            | 23 (2.4)       | 0.321         |
| Compartment syndrome, n (%)                  | 1 (0.9)              | 0 (0)                | 1 (1.02)             | 0 (0)                | 0 (0)                | 0 (0)                | 2 (1.2)              | 14 (1.5)       | 0.848         |
| Vascular compromise, n (%)                   | 0 (0)                | 0 (0)                | 2 (2.0)              | 0 (0)                | 0 (0)                | 0 (0)                | 0 (0)                | 13 (1.4)       | 0.346         |
| Reoperation (any reason), n (%)              | 3 (2.8)              | 0 (0)                | 4 (4.0)              | 2 (1.3)              | 4 (2.7)              | 1 (0.7)              | 4 (2.4)              | 10 (1.1)       | 0.957         |
| <b>Admission characteristics</b>             |                      |                      |                      |                      |                      |                      |                      |                |               |
| Transferred from outside hospital, n (%)     | 89 (82.4)            | 88 (77.9)            | 72 (71.3)            | 120 (76.0)           | 116 (77.3)           | 118 (80.8)           | 127 (75.2)           | 0 (0)          | 0.632         |
| Summer surgery, n (%)                        | 74 (68.5)            | 89 (78.8)            | 75 (74.3)            | 113 (71.5)           | 112 (74.7)           | 102 (69.9)           | 120 (71.0)           | 0 (0)          | 0.580         |
| Evening, overnight or weekend surgery, n (%) | 52 (48.2)            | 59 (52.2)            | 50 (49.5)            | 100 (63.3)           | 86 (57.3)            | 74 (50.7)            | 98 (58.0)            | 0 (0)          | 0.182         |
| Delay to fixation (hours), mean ( $\pm$ SD)  | 13.73 ( $\pm$ 18.44) | 12.74 ( $\pm$ 5.99)  | 11.53 ( $\pm$ 6.54)  | 13.49 ( $\pm$ 7.54)  | 12.39 ( $\pm$ 7.34)  | 12.54 ( $\pm$ 6.71)  | 11.27 ( $\pm$ 6.28)  | 31 (3.3)       | 0.075         |
| Surgical duration (mins), mean ( $\pm$ SD)   | 81.40 ( $\pm$ 21.51) | 81.60 ( $\pm$ 30.95) | 86.43 ( $\pm$ 59.75) | 85.13 ( $\pm$ 42.77) | 81.23 ( $\pm$ 32.35) | 78.42 ( $\pm$ 29.91) | 69.98 ( $\pm$ 32.87) | 4 (0.4)        | 0.003         |
| Length of stay (days), mean ( $\pm$ SD)      | 1.25 ( $\pm$ 1.08)   | 1.22 ( $\pm$ 0.41)   | 1.28 ( $\pm$ 0.70)   | 1.20 ( $\pm$ 0.40)   | 1.23 ( $\pm$ 0.43)   | 1.22 ( $\pm$ 0.47)   | 1.14 ( $\pm$ 0.48)   | 4 (0.4)        | 0.16          |
| Cost of index admission, mean ( $\pm$ SD)    | 2560 ( $\pm$ 1190)   | 2306 ( $\pm$ 507)    | 2685 ( $\pm$ 951)    | 2512 ( $\pm$ 673)    | 2529 ( $\pm$ 599)    | 2457 ( $\pm$ 586)    | 2353 ( $\pm$ 767)    | 4 (0.4)        | 0.185         |

Table 1b (Femur)

|                                              | 2008 (n=47)          | 2009 (n=49)           | 2010 (n=52)           | 2011 (n=83)           | 2012 (n=55)           | 2013 (n=66)           | 2014 (n=69)          | Missing, n (%) | p (for trend) |
|----------------------------------------------|----------------------|-----------------------|-----------------------|-----------------------|-----------------------|-----------------------|----------------------|----------------|---------------|
| <b>Demographics</b>                          |                      |                       |                       |                       |                       |                       |                      |                |               |
| Age, mean ( $\pm$ SD)                        | 5.19 ( $\pm$ 4.22)   | 6.00 ( $\pm$ 4.55)    | 5.65 ( $\pm$ 4.33)    | 5.61 ( $\pm$ 4.44)    | 6.80 ( $\pm$ 4.84)    | 4.73 ( $\pm$ 4.28)    | 4.97 ( $\pm$ 4.08)   | 0 (0)          | 0.695         |
| Female, n (%)                                | 14 (29.8)            | 7 (14.3)              | 18 (34.6)             | 20 (24.1)             | 16 (29.1)             | 18 (27.3)             | 15 (21.7)            | 0 (0)          | 0.844         |
| Presence of any comorbidity, n (%)           | 0 (0.0)              | 1 (2.0)               | 0 (0.0)               | 2 (2.4)               | 2 (3.6)               | 8 (12.1)              | 8 (11.6)             | 0 (0)          | <0.001        |
| <b>Injury characteristics</b>                |                      |                       |                       |                       |                       |                       |                      |                |               |
| Fixation (vs. spica casting), n (%)          | 15 (31.9)            | 24 (49.0)             | 23 (44.2)             | 38 (45.8)             | 30 (54.5)             | 24 (36.4)             | 29 (42.0)            | 0 (0)          | 0.830         |
| High energy mechanism, n (%)                 | 46 (97.9)            | 44 (89.8)             | 48 (92.3)             | 81 (97.6)             | 52 (94.5)             | 65 (98.5)             | 69 (100.0)           | 2 (0.5)        | 0.022         |
| Open fracture, n (%)                         | 1 (2.1)              | 0 (0.0)               | 0 (0.0)               | 1 (1.2)               | 1 (1.8)               | 0 (0.0)               | 1 (1.4)              | 0 (0)          | 0.996         |
| Associated injury, n (%)                     | 1 (2.1)              | 1 (2)                 | 0 (0.0)               | 5 (6.0)               | 2 (3.6)               | 5 (7.6)               | 3 (4.3)              | 0 (0)          | 0.131         |
| Reoperation (any reason), n (%)              | 3 (6.4)              | 11 (22.5)             | 7 (13.5)              | 16 (19.3)             | 11 (20.0)             | 8 (12.1)              | 2 (2.9)              | 0 (0)          | 0.162         |
| <b>Admission characteristics</b>             |                      |                       |                       |                       |                       |                       |                      |                |               |
| Transferred from outside hospital, n (%)     | 38 (80.9)            | 40 (81.6)             | 46 (88.5)             | 59 (71.1)             | 47 (85.5)             | 48 (72.7)             | 60 (87.0)            | 0 (0)          | 0.985         |
| Summer surgery, n (%)                        | 18 (38.3)            | 28 (57.1)             | 29 (55.8)             | 50 (60.2)             | 30 (54.5)             | 35 (53.0)             | 38 (55.1)            | 0 (0)          | 0.333         |
| Evening, overnight or weekend surgery, n (%) | 31 (66)              | 28 (57.1)             | 31 (59.6)             | 43 (51.8)             | 32 (58.2)             | 33 (50.0)             | 27 (39.1)            | 0 (0)          | 0.005         |
| Delay to fixation (hours), mean ( $\pm$ SD)  | 18.72 ( $\pm$ 26.01) | 24.13 ( $\pm$ 58.70)  | 15.30 ( $\pm$ 8.55)   | 19.77 ( $\pm$ 14.67)  | 16.55 ( $\pm$ 12.04)  | 15.65 ( $\pm$ 10.57)  | 18.68 ( $\pm$ 22.20) | 7 (1.6)        | 0.075         |
| Surgical duration (mins), mean ( $\pm$ SD)   | 99.13 ( $\pm$ 61.61) | 112.61 ( $\pm$ 57.52) | 104.31 ( $\pm$ 58.65) | 126.99 ( $\pm$ 83.65) | 129.11 ( $\pm$ 76.35) | 107.03 ( $\pm$ 72.10) | 97.14 ( $\pm$ 51.33) | 0 (0)          | 0.003         |
| Length of stay (days), mean ( $\pm$ SD)      | 2.57 ( $\pm$ 1.84)   | 3.08 ( $\pm$ 3.11)    | 2.29 ( $\pm$ 1.21)    | 3.00 ( $\pm$ 3.32)    | 2.29 ( $\pm$ 1.24)    | 2.35 ( $\pm$ 2.50)    | 2.86 ( $\pm$ 6.39)   | 0 (0)          | 0.158         |
| Cost of index admission, mean ( $\pm$ SD)    | 4152 ( $\pm$ 2193)   | 4865 ( $\pm$ 3961)    | 4083 ( $\pm$ 1843)    | 5541 ( $\pm$ 7728)    | 4494 ( $\pm$ 2037)    | 4871 ( $\pm$ 8029)    | 6139 ( $\pm$ 17646)  | 0 (0)          | 0.185         |

1  
2  
3  
4  
5  
6  
7  
8  
9  
10  
11  
12  
13  
14  
15  
16  
17  
18  
19  
20  
21  
22  
23  
24  
25  
26  
27  
28  
29  
30  
31  
32  
33  
34  
35  
36  
37  
38  
39  
40  
41  
42  
43  
44  
45  
46  
47  
48  
49  
50  
51  
52  
53  
54  
55  
56  
57  
58  
59  
60

---

| <b>SCH fracture</b> |                             |                |
|---------------------|-----------------------------|----------------|
|                     | <b>Adjusted IRR, 95% CI</b> | <b>p-value</b> |
| <b>Overall</b>      | 1.075 (1.072-1.079)         | <0.001         |
| <b>Transferred</b>  | 1.069 (1.065-1.073)         | <0.001         |
| <b>Direct</b>       | 1.075 (1.075-1.10)          | <0.001         |
| <b>Gartland 2</b>   | 1.088 (1.080-1.097)         | <0.001         |
| <b>Gartland 3</b>   | 1.070 (1.064-1.075)         | <0.001         |

  

| <b>Femur fracture</b> |                             |                |
|-----------------------|-----------------------------|----------------|
|                       | <b>Adjusted IRR, 95% CI</b> | <b>p-value</b> |
| <b>Overall</b>        | 1.053 (1.044-1.062)         | <0.001         |
| <b>Transferred</b>    | 1.056 (1.048-1.065)         | <0.001         |
| <b>Direct</b>         | 1.060 (0.99-1.13)           | 0.089*         |
| <b>Spica</b>          | 1.055 (1.037-1.74)          | <0.001         |
| <b>Fixation</b>       | 1.060 (1.043-1.69)          | <0.001         |

---



1  
2  
3  
4  
5  
6  
7  
8  
9  
10  
11  
12  
13  
14  
15  
16  
17  
18  
19  
20  
21  
22  
23  
24  
25  
26  
27  
28  
29  
30  
31  
32  
33  
34  
35  
36  
37  
38  
39  
40  
41  
42  
43  
44  
45  
46  
47  
48  
49  
50  
51  
52  
53  
54  
55  
56  
57  
58  
59  
60

**Table of contents**

Study timeframe definitions – Page 2

Incidence of supracondylar humerus fractures treated in Ontario between 2002-2010 from *Khoshbin et al.* – Page 3

Confidential

**Supplementary Figure 1: Study timeframe definitions**

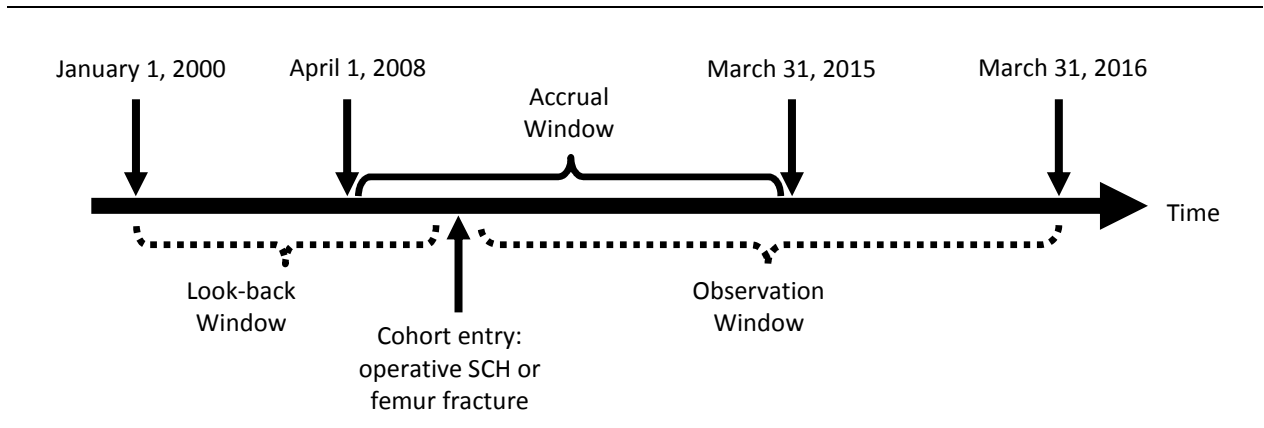

Confidential

**Supplementary Table 1: Incidence of supracondylar humerus fractures treated in Ontario between 2002-2010 from *Khoshbin et al.***

| Year/Season                                          | Surgical Technique |             | Total |
|------------------------------------------------------|--------------------|-------------|-------|
|                                                      | CRPP               | OR          |       |
| April 2002 – March 2003<br>(Summer 2002/Winter 2003) | 287 (73.8%)        | 102 (26.2%) | 389   |
| April 2003 – March 2004<br>(Summer 2003/Winter 2004) | 318 (80.1%)        | 79 (19.9%)  | 397   |
| April 2004 – March 2005<br>(Summer 2004/Winter 2005) | 357 (82.1%)        | 78 (17.9%)  | 435   |
| April 2005 – March 2006<br>(Summer 2005/Winter 2006) | 328(77.0%)         | 98 (23.0%)  | 426   |
| April 2006 – March 2007<br>(Summer 2006/Winter 2007) | 349 (78.6%)        | 95(21.4%)   | 444   |
| April 2007 – March 2008<br>(Summer 2007/Winter 2008) | 307 (77.7%)        | 88 (22.3%)  | 395   |
| April 2008 – March 2009<br>(Summer 2008/Winter 2009) | 309 (80.5%)        | 75 (19.5%)  | 384   |
| April 2009 – March 2010<br>(Summer 2009/Winter 2010) | 292 (80.0%)        | 73 (20.0%)  | 364   |
| Total                                                | 2547               | 688         | 3235  |

STROBE Statement—checklist of items that should be included in reports of observational studies

|                           | Item No. | Recommendation                                                                                                                                                                       | Page No.   | Relevant text from manuscript                                                                                                   |
|---------------------------|----------|--------------------------------------------------------------------------------------------------------------------------------------------------------------------------------------|------------|---------------------------------------------------------------------------------------------------------------------------------|
| <b>Title and abstract</b> | 1        | (a) Indicate the study’s design with a commonly used term in the title or the abstract                                                                                               | 1          | “We conducted a retrospective, serial, cross-sectional study at the Hospital for Sick Children (SickKids) in Toronto, Ontario.” |
|                           |          | (b) Provide in the abstract an informative and balanced summary of what was done and what was found                                                                                  | 2          | See abstract.                                                                                                                   |
| <b>Introduction</b>       |          |                                                                                                                                                                                      |            |                                                                                                                                 |
| Background/rationale      | 2        | Explain the scientific background and rationale for the investigation being reported                                                                                                 | 3          | See introduction.                                                                                                               |
| Objectives                | 3        | State specific objectives, including any prespecified hypotheses                                                                                                                     | 3          | See introduction.                                                                                                               |
| <b>Methods</b>            |          |                                                                                                                                                                                      |            |                                                                                                                                 |
| Study design              | 4        | Present key elements of study design early in the paper                                                                                                                              | 4          | See “setting” and “population”.                                                                                                 |
| Setting                   | 5        | Describe the setting, locations, and relevant dates, including periods of recruitment, exposure, follow-up, and data collection                                                      | 4          | See “setting” and “population”.                                                                                                 |
| Participants              | 6        | <i>Cross-sectional study</i> —Give the eligibility criteria, and the sources and methods of selection of participants                                                                | 4          | See “setting” and “population”.                                                                                                 |
| Variables                 | 7        | Clearly define all outcomes, exposures, predictors, potential confounders, and effect modifiers. Give diagnostic criteria, if applicable                                             | 5-6        | See “outcomes” and “main exposure”.                                                                                             |
| Data sources/ measurement | 8*       | For each variable of interest, give sources of data and details of methods of assessment (measurement). Describe comparability of assessment methods if there is more than one group | 5-6        | See “outcomes” and “main exposure”.                                                                                             |
| Bias                      | 9        | Describe any efforts to address potential sources of bias                                                                                                                            | 6-7, 12-13 | “Statistical analysis”, “Sensitivity analyses”<br>“Limitations”                                                                 |
| Study size                | 10       | Explain how the study size was arrived at                                                                                                                                            | N/A        | N/A                                                                                                                             |

Continued on next page

|                        |     |                                                                                                                                                                                                              |            |                                                                                                                                                                                                                                                                                                             |
|------------------------|-----|--------------------------------------------------------------------------------------------------------------------------------------------------------------------------------------------------------------|------------|-------------------------------------------------------------------------------------------------------------------------------------------------------------------------------------------------------------------------------------------------------------------------------------------------------------|
| Quantitative variables | 11  | Explain how quantitative variables were handled in the analyses. If applicable, describe which groupings were chosen and why                                                                                 | 5-6        | See “outcomes” and “main exposure”.                                                                                                                                                                                                                                                                         |
| Statistical methods    | 12  | (a) Describe all statistical methods, including those used to control for confounding                                                                                                                        | 6-7        | “Statistical analysis”, “Sensitivity analyses”                                                                                                                                                                                                                                                              |
|                        |     | (b) Describe any methods used to examine subgroups and interactions                                                                                                                                          | 6-7        | “Statistical analysis”, “Sensitivity analyses”                                                                                                                                                                                                                                                              |
|                        |     | (c) Explain how missing data were addressed                                                                                                                                                                  | N/A        | Reported in Tables 1a and 1b. Missing data was not a concern in this study.                                                                                                                                                                                                                                 |
|                        |     | (d) <i>Cross-sectional study</i> —If applicable, describe analytical methods taking account of sampling strategy                                                                                             | 4          | See “setting” and “population”.                                                                                                                                                                                                                                                                             |
|                        |     | (e) Describe any sensitivity analyses                                                                                                                                                                        | 7          | “Sensitivity analyses”                                                                                                                                                                                                                                                                                      |
| <b>Results</b>         |     |                                                                                                                                                                                                              |            |                                                                                                                                                                                                                                                                                                             |
| Participants           | 13* | (a) Report numbers of individuals at each stage of study—eg numbers potentially eligible, examined for eligibility, confirmed eligible, included in the study, completing follow-up, and analysed            | 4          | “Population”, Figure 1 and Tables 1a and 1b.                                                                                                                                                                                                                                                                |
|                        |     | (b) Give reasons for non-participation at each stage                                                                                                                                                         | 4          | “Population” and Figure 1.                                                                                                                                                                                                                                                                                  |
|                        |     | (c) Consider use of a flow diagram                                                                                                                                                                           | N/A        | See Figure 1.                                                                                                                                                                                                                                                                                               |
| Descriptive data       | 14* | (a) Give characteristics of study participants (eg demographic, clinical, social) and information on exposures and potential confounders                                                                     |            |                                                                                                                                                                                                                                                                                                             |
|                        |     | (b) Indicate number of participants with missing data for each variable of interest                                                                                                                          | N/A        | Reported in Tables 1a and 1b. Missing data was not a concern in this study.                                                                                                                                                                                                                                 |
| Outcome data           | 15* | <i>Cross-sectional study</i> —Report numbers of outcome events or summary measures                                                                                                                           | Tables     | Table 1 and 2, Figure 3                                                                                                                                                                                                                                                                                     |
| Main results           | 16  | (a) Give unadjusted estimates and, if applicable, confounder-adjusted estimates and their precision (eg, 95% confidence interval). Make clear which confounders were adjusted for and why they were included | 6, Table 2 | “To address potential temporal confounding by demographic, injury and admission characteristics that may have differentially motivated paediatric orthopaedic specialist referral by year, adjusted IRRs were calculated using two multivariable negative binomial regression models.” Reported in Table 2. |
|                        |     | (b) Report category boundaries when continuous variables were categorized                                                                                                                                    | N/A        | N/A                                                                                                                                                                                                                                                                                                         |
|                        |     | (c) If relevant, consider translating estimates of relative risk into absolute risk for a meaningful time period                                                                                             | N/A        | N/A                                                                                                                                                                                                                                                                                                         |

1  
2  
3  
4  
5  
6  
7  
8  
9  
10  
11  
12  
13  
14  
15  
16  
17  
18  
19  
20  
21  
22  
23  
24  
25  
26  
27  
28  
29  
30  
31  
32  
33  
34  
35  
36  
37  
38  
39  
40  
41  
42  
43  
44  
45  
46  
47  
48  
49

Continued on next page

|                |    |                                                                                                |     |                                                     |
|----------------|----|------------------------------------------------------------------------------------------------|-----|-----------------------------------------------------|
| Other analyses | 17 | Report other analyses done—eg analyses of subgroups and interactions, and sensitivity analyses | 8-9 | See “sensitivity analyses” and “secondary outcomes” |
|----------------|----|------------------------------------------------------------------------------------------------|-----|-----------------------------------------------------|

**Discussion**

|             |    |                                                          |   |                      |
|-------------|----|----------------------------------------------------------|---|----------------------|
| Key results | 18 | Summarise key results with reference to study objectives | 9 | “Principal findings” |
|-------------|----|----------------------------------------------------------|---|----------------------|

|             |    |                                                                                                                                                            |    |               |
|-------------|----|------------------------------------------------------------------------------------------------------------------------------------------------------------|----|---------------|
| Limitations | 19 | Discuss limitations of the study, taking into account sources of potential bias or imprecision. Discuss both direction and magnitude of any potential bias | 12 | “Limitations” |
|-------------|----|------------------------------------------------------------------------------------------------------------------------------------------------------------|----|---------------|

|                |    |                                                                                                                                                                            |    |                                     |
|----------------|----|----------------------------------------------------------------------------------------------------------------------------------------------------------------------------|----|-------------------------------------|
| Interpretation | 20 | Give a cautious overall interpretation of results considering objectives, limitations, multiplicity of analyses, results from similar studies, and other relevant evidence | 10 | “Implications”, “Final conclusions” |
|----------------|----|----------------------------------------------------------------------------------------------------------------------------------------------------------------------------|----|-------------------------------------|

|                  |    |                                                                       |           |                                                                                                                                                                                              |
|------------------|----|-----------------------------------------------------------------------|-----------|----------------------------------------------------------------------------------------------------------------------------------------------------------------------------------------------|
| Generalisability | 21 | Discuss the generalisability (external validity) of the study results | Title, 13 | We examine practice in the “Greater Toronto Area”, “We only evaluated two operative fracture types”, “Further work is needed to...determine if the phenomenon is found in other specialties” |
|------------------|----|-----------------------------------------------------------------------|-----------|----------------------------------------------------------------------------------------------------------------------------------------------------------------------------------------------|

**Other information**

|         |    |                                                                                                                                                               |    |                     |
|---------|----|---------------------------------------------------------------------------------------------------------------------------------------------------------------|----|---------------------|
| Funding | 22 | Give the source of funding and the role of the funders for the present study and, if applicable, for the original study on which the present article is based | 13 | “SOURCE OF FUNDING” |
|---------|----|---------------------------------------------------------------------------------------------------------------------------------------------------------------|----|---------------------|

\*Give information separately for cases and controls in case-control studies and, if applicable, for exposed and unexposed groups in cohort and cross-sectional studies.

**Note:** An Explanation and Elaboration article discusses each checklist item and gives methodological background and published examples of transparent reporting. The STROBE checklist is best used in conjunction with this article (freely available on the Web sites of PLoS Medicine at <http://www.plosmedicine.org/>, Annals of Internal Medicine at <http://www.annals.org/>, and Epidemiology at <http://www.epidem.com/>). Information on the STROBE Initiative is available at [www.strobe-statement.org](http://www.strobe-statement.org).
